# Supplementary material
Source: Research Square preprint supplement (doi:10.21203/rs.3.rs-9312772/v1)
Supplement: Supplementary file 1 [file c61c0fc415bdf8029200e895.docx]

# Highlights

- Nicotine use was nearly universal among people who use drugs in Kyrgyzstan, with almost 80% reporting daily cigarette smoking.
- Combustible tobacco and nasvay remain deeply entrenched, while awareness and use of newer nicotine products are limited.
- Use of vaping products and heated tobacco was concentrated among younger, female, and higher-income participants.
- Marked regional and socioeconomic differences shape patterns of nicotine product use.
- Integrating tobacco harm reduction into drug harm reduction services represents a major, currently underused opportunity.
